# Supplementary material for: High performance MWCNT–Pt nanocomposite-based cathode for passive direct methanol fuel cells
Source: Royal Society of Chemistry journal article supplement (doi:10.1039/c6ra28703d), 2017-01-01
Supplement: c6ra28703d1.pdf [file c6ra28703d1.pdf]

## Supplementary Information

### High performance MWCNT-Pt nanocomposite-based cathode for passive direct methanol fuel cells

Longjuan Pu, Liangliang Zou, Yi Zhou\*, Zhiqing Zou, Hui Yang\*

*Shanghai Advanced Research Institute, Chinese Academy of Sciences, Shanghai*

*201210, China*

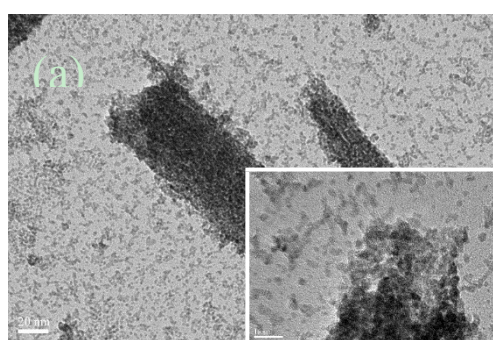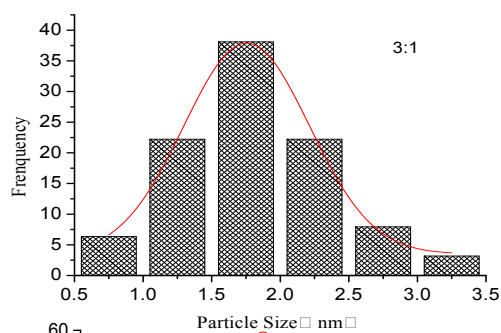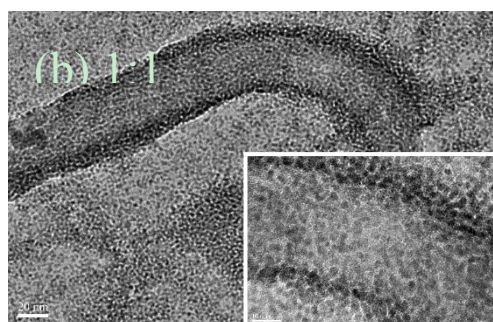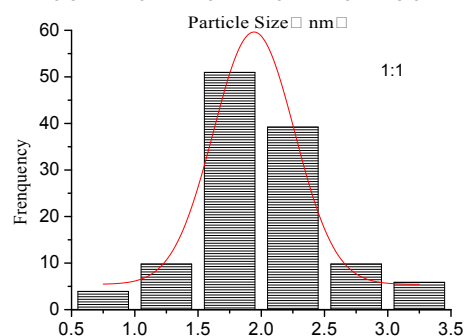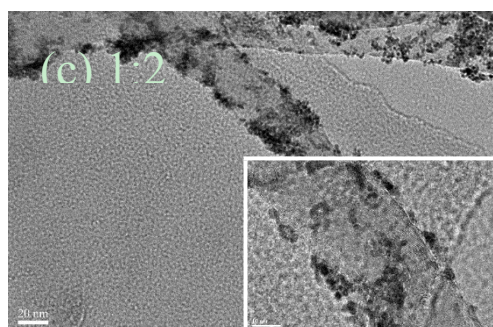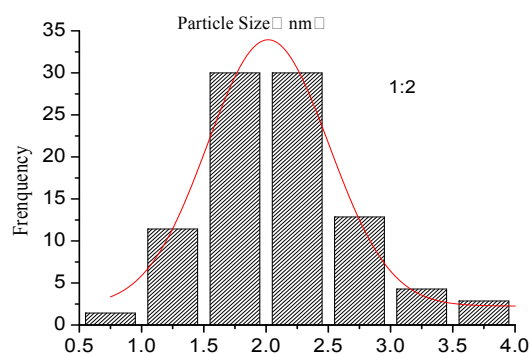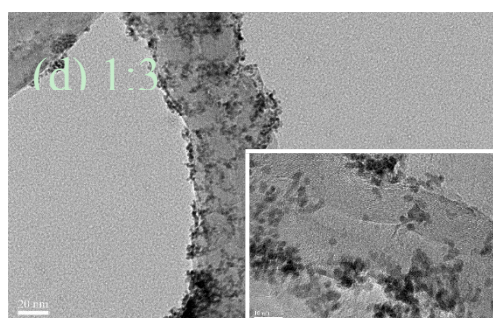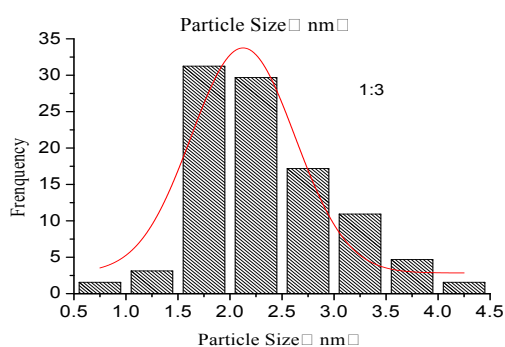

**Fig. S1.** TEM & HRTEM images and the corresponding particle size distribution histograms of different mass ratios of Pt and MWCNT: (a) 3:1, (b) 1:1, (c) 1:2, (d) 1:3
